# Supplementary material
Source: PubMed Central journal article supplement (PMC3298377)
Supplement: NIHMS359468-supplement-2_si_002.pdf [file NIHMS359468-supplement-2_si_002.pdf]

## Supporting Information

### Synthesis and Structural, EPR and Mössbauer Characterizations of a ( $\mu$ -Alkoxo)( $\mu$ -Carboxylato)Diiron(II,III) Model Complex for the Mixed-valent Diiron Active Site of Myo-Inositol Oxygenase

by F. Li, M. Chakrabarti, Y. Dong, K. Kauffmann, E. L. Bominaar, E. Münck, and L. Que, Jr.

**Gaussian 03**, Revision E.01,

M. J. Frisch, G. W. Trucks, H. B. Schlegel, G. E. Scuseria, M. A. Robb, J. R. Cheeseman, J. A. Montgomery, Jr., T. Vreven, K. N. Kudin, J. C. Burant, J. M. Millam, S. S. Iyengar, J. Tomasi, V. Barone, B. Mennucci, M. Cossi, G. Scalmani, N. Rega, G. A. Petersson, H. Nakatsuji, M. Hada, M. Ehara, K. Toyota, R. Fukuda, J. Hasegawa, M. Ishida, T. Nakajima, Y. Honda, O. Kitao, H. Nakai, M. Klene, X. Li, J. E. Knox, H. P. Hratchian, J. B. Cross, V. Bakken, C. Adamo, J. Jaramillo, R. Gomperts, R. E. Stratmann, O. Yazyev, A. J. Austin, R. Cammi, C. Pomelli, J. W. Ochterski, P. Y. Ayala, K. Morokuma, G. A. Voth, P. Salvador, J. J. Dannenberg, V. G. Zakrzewski, S. Dapprich, A. D. Daniels, M. C. Strain, O. Farkas, D. K. Malick, A. D. Rabuck, K. Raghavachari, J. B. Foresman, J. V. Ortiz, Q. Cui, A. G. Baboul, S. Clifford, J. Cioslowski, B. B. Stefanov, G. Liu, A. Liashenko, P. Piskorz, I. Komaromi, R. L. Martin, D. J. Fox, T. Keith, M. A. Al-Laham, C. Y. Peng, A. Nanayakkara, M. Challacombe, P. M. W. Gill, B. Johnson, W. Chen, M. W. Wong, C. Gonzalez, and J. A. Pople, Gaussian, Inc., Wallingford CT, 2004.

#### S1. Details of parameter extraction from Mössbauer/EPR data of 1

The initial guesses for the ZFS parameters were generated with the scheme in eq 13. Using eq 5, the experimental  $\mathcal{A}_{\xi\xi}^A$  values ( $-57.3$ ,  $-43.0$ ,  $-46.7$ ) MHz imply the  $\mathcal{D}_{\xi\xi}^e/J$  values ( $-0.316$ ,  $0.228$ ,  $0.088$ ), which yield, for  $J = 22.5 \text{ cm}^{-1}$ , the  $\mathcal{D}_{\xi\xi}^e$  values ( $7.10$ ,  $5.13$ ,  $1.97$ )  $\text{cm}^{-1}$ . The EPR g-values for the  $S = 1/2$  ground state are ( $1.75$ ,  $1.88$ ,  $1.96$ ) and give, using eq 8, the  $g_{\xi\xi}^B$  values ( $2.145$ ,  $2.114$ ,  $2.033$ ); the corresponding  $\Delta g_{\xi\xi}^B = g_{\xi\xi}^B - 2$  are listed in the first row of Table S1. Using eq 11, the  $g_{\xi\xi}^B$  values yield the  $\mathcal{D}_{\xi\xi}^B$  values ( $-1.90$ ,  $-0.68$ ,  $2.58$ )  $\text{cm}^{-1}$ , which represent the main contribution, arising from the  $S = 2$  excited states, to the ZFS of the ferrous site,  $\text{Fe}_B$ . Assuming that  $\mathcal{D}^B \approx \mathcal{D}^B(S = 2)$ , these values yield  $D_B = 3.88 \text{ cm}^{-1}$  and  $E_B/D_B = -0.16$ . Finally, eq 12 yields the  $\mathcal{D}_{\xi\xi}^A$  values ( $-0.175$ ,  $0.898$ ,  $-0.723$ )  $\text{cm}^{-1}$  [ $D_A = -1.08 \text{ cm}^{-1}$  and  $E_A/D_A = 0.49$ ].

The above example represents one out of  $3! = 6$  possible ways to associate the principal axes of the  $g$  tensor with the collinear axes of the  $\mathcal{A}^A$  and  $\mathcal{D}^c$  tensors, which have been adopted as the  $\{x, y, z\}$  frame of reference throughout the SI. The  $\Delta g_\xi^B$  and ZFS parameters obtained for the six mappings are listed in Table S1.

In each case, the largest  $\Delta g_\xi^B$  value corresponds to the smallest  $g_\xi$  value of the coupled system. The  $D_A$  and  $D_B$  values listed in Table S1 have been associated with the  $z$  axis by definition. ZFS parameters which do not fulfill the inequalities  $0 \leq E_X/D_X \leq 1/3$  ( $X = A, B$ ) can be redefined by taking  $D_X$  ( $X = A, B$ ) along  $x$  or  $y$ . Table S2 presents the axes for which ZFS parameters appear in standard convention,  $0 \leq E_X/D_X \leq 1/3$ . Table S2 shows that  $D_B$  is positive when the  $D_B$  axis is parallel to the direction for which the  $g$ -value is closest to 2, i.e. along the  $\xi$  axis ( $\xi = x, y, \text{ or } z$ ) for which  $g_\xi = 1.96$  in Table S1 (this is the axis along which the orbital angular momentum is approximately zero). Alternately,  $D_B$  is negative when the  $D_B$  axis is perpendicular to the direction  $\xi$  for which  $g_\xi = 1.96$ . These properties follow from the  $\mathcal{D}^B - \Delta g^B$  relationship in eq 11.

In the context of a distorted  ${}^5T_2$  crystal-field description for  $\text{Fe}_B$ ,  $D_B$  is positive when  $E(t_2) > (E(t_3) - E(t_1))/2$ , where  $\{t_1, t_2, t_3\}$  is the set  $\{d_{xy}, d_{xz}, d_{yz}\}$  and the crystal-field splitting energies satisfy the relations  $E(t_1) < E(t_2) \leq E(t_3)$ .  $D_B$  is negative when  $E(t_2) < (E(t_3) - E(t_1))/2$ .

**Table S1.**  $g$ -values of complex **1**,  $g - 2$  values for  $\text{Fe}^{\text{II}}$  site, and zero-field parameters for  $\text{Fe}^{\text{III}}$  (site A) and  $\text{Fe}^{\text{II}}$  (site B)

| # | $g_x$ | $g_y$ | $g_z$ | $\Delta g_x^B$ | $\Delta g_y^B$ | $\Delta g_z^B$ | $D_B^{a,b}$ | $E_B/D_B$ | $D_A^{a,b}$ | $E_A/D_A$ |
|---|-------|-------|-------|----------------|----------------|----------------|-------------|-----------|-------------|-----------|
| 1 | 1.75  | 1.88  | 1.96  | 0.145          | 0.114          | 0.033          | 3.88        | -0.16     | -1.08       | 0.49      |
| 2 | 1.88  | 1.75  | 1.96  | 0.070          | 0.238          | 0.033          | 4.85        | 0.70      | -1.45       | 1.40      |
| 3 | 1.75  | 1.96  | 1.88  | 0.145          | 0.038          | 0.098          | -0.26       | 8.17      | 0.47        | 0.08      |
| 4 | 1.88  | 1.96  | 1.75  | 0.070          | 0.038          | 0.204          | -6.01       | 0.10      | 2.62        | -0.20     |
| 5 | 1.96  | 1.75  | 1.88  | 0.023          | 0.238          | 0.098          | 1.31        | 3.29      | -0.12       | 19.56     |
| 6 | 1.96  | 1.88  | 1.75  | 0.023          | 0.114          | 0.204          | -5.42       | -0.34     | 2.40        | -0.60     |

<sup>a</sup> Along  $z$  axis. <sup>b</sup> In wavenumbers.

**Table S2.** Zero-field parameters for  $\text{Fe}^{\text{II}}$  (site B) and  $\text{Fe}^{\text{III}}$  (site A) of Table S1 in standard representation<sup>a</sup>

| # | $D_B^{a,b}$ | Axis $D_B$ | $E_B/D_B$ | $D_A^{a,b}$ | Axis $D_A$ | $E_A/D_A$ |
|---|-------------|------------|-----------|-------------|------------|-----------|
| 1 | 3.88        | $z$        | 0.16      | 1.35        | $y$        | 0.20      |
| 2 | -7.49       | $y$        | 0.10      | 3.77        | $y$        | 0.08      |
| 3 | 3.33        | $y$        | 0.28      | 0.47        | $z$        | 0.08      |
| 4 | -6.01       | $z$        | 0.10      | 2.62        | $z$        | 0.20      |
| 5 | -7.11       | $y$        | 0.21      | 3.63        | $y$        | 0.31      |
| 6 | 5.44        | $x$        | 0.03      | -3.37       | $x$        | 0.14      |

<sup>a</sup>  $0 \leq E_X/D_X \leq 1/3$ ,  $X = A, B$ . <sup>b</sup> In wavenumbers.

**Table S3.**  $(E/D)_B$ ,  $D_A$ , and  $(E/D)_B$  obtained using eqs S2a-c and  $\mathcal{D}_{xx}^e = 7.10 \text{ cm}^{-1}$ ,  $\mathcal{D}_{yy}^e = 5.13 \text{ cm}^{-1}$ ,  $\mathcal{D}_{zz}^e = 1.97 \text{ cm}^{-1}$ , and the value for  $Q_{cl}$  with  $D_B$  values obtained for the six permutations in Table S1

| # | $Q^a$ | $Q_{sc}^b$ | $Q_{cl}^c$ | $D_B^d$ | $E_B/D_B$ | $D_A^d$ | $E_A/D_A$ |
|---|-------|------------|------------|---------|-----------|---------|-----------|
| 1 | -0.21 | 0.21       | -0.15      | 3.88    | -0.10     | -1.08   | 0.58      |
| 2 | 0.63  | 0.13       | 0.59       | 4.85    | 0.65      | -1.45   | 1.34      |
| 3 | 15.56 | 0.31       | 2.09       | -0.26   | 0.34      | 0.47    | -1.57     |
| 4 | 0.14  | 0.14       | 0.15       | -6.01   | 0.11      | 2.62    | -0.20     |
| 5 | 2.87  | 0.20       | 2.09       | 1.31    | 2.44      | -0.12   | 16.06     |
| 6 | -0.30 | 0.30       | -0.15      | -5.42   | -0.19     | 2.40    | -0.49     |

<sup>a</sup>  $Q = (\mathcal{D}_{xx}^{3/2} - \mathcal{D}_{yy}^{3/2}) / (3 \mathcal{D}_{zz}^{3/2})$  where  $\mathcal{D}_{\xi\xi}^{3/2} = -(4/15) \mathcal{D}_{\xi\xi}^A - \mathcal{D}_{\xi\xi}^B$ .

<sup>b</sup>  $Q_{sc} = E_{3/2}/D_{3/2}$  in standard convention  $0 \leq E_{3/2}/D_{3/2} \leq 1/3$ .

<sup>c</sup> According to eq S1 there are six values for  $E_{3/2}/D_{3/2}$  for which this ratio is consistent with the EPR data for  $S = 3/2$ .  $Q_{cl}$  is among these six values the one closest to the value for  $Q$  given in second column.

<sup>d</sup> In wavenumbers.

**Table S4.** Zero-field parameters for  $Fe^{II}$  (site B) and  $Fe^{III}$  (site A) of Table S3 in standard representation<sup>a</sup>

| # <sup>a</sup> | $D_B$ | Axis $D_B^{b,c}$ | $E_B/D_B$ | $D_A$ | Axis $D_A^{b,c}$ | $E_A/D_A$ |
|----------------|-------|------------------|-----------|-------|------------------|-----------|
| 1              | 3.88  | z                | 0.10      | 1.48  | y                | 0.16      |
| 2              | -7.13 | y                | 0.12      | 3.64  | y                | 0.07      |
| 3              | 0.26  | y                | 0.33      | -1.33 | x                | 0.10      |
| 4              | -6.01 | z                | 0.11      | 2.62  | z                | 0.20      |
| 5              | -5.45 | y                | 0.17      | 3.01  | y                | 0.31      |
| 6              | -5.42 | z                | 0.19      | -2.92 | x                | 0.21      |

<sup>a</sup> Numbering of cases defined in Table S1. <sup>b</sup>  $0 \leq E_X/D_X \leq 1/3$ ,  $X = A, B$ . <sup>c</sup> In wavenumbers.

At this juncture, there are six admissible sets of ZFS parameters (Tables S1-2). We now analyze to what extent these sets are consistent with the EPR data for the  $S = 3/2$  excited state. The simulation of the excited  $S = 3/2$  state spectrum gives an estimate for the rhombicity ratio  $E_{3/2}/D_{3/2} = 0.15$ . It should be noted that this value refers to the standard convention according to which  $E_{3/2}/D_{3/2} = (\mathcal{D}_{x'x'}^{3/2} - \mathcal{D}_{y'y'}^{3/2}) / (3 \mathcal{D}_{z'z'}^{3/2})$  where the  $\{x', y', z'\}$  axes are labeled such that  $|\mathcal{D}_{x'x'}^{3/2}| \leq |\mathcal{D}_{y'y'}^{3/2}| \leq |\mathcal{D}_{z'z'}^{3/2}|$ . This convention implies  $0 \leq E_{3/2}/D_{3/2} \leq 1/3$ . In general, depending on the permutation of  $\{x', y', z'\}$  relative to  $\{x, y, z\}$ ,  $E/D$  defined as  $(\mathcal{D}_{xx}^{3/2} - \mathcal{D}_{yy}^{3/2}) / (3 \mathcal{D}_{zz}^{3/2})$  (N.B. no primes) has one of the following values:

$$\pm E/D, \pm \frac{1-E/D}{1+3E/D}, \pm \frac{1+E/D}{1-3E/D}. \quad (S1)$$

Thus, for  $E_{3/2}/D_{3/2} = 0.15$ , we have the allowed values  $\pm 0.15$ ,  $\pm 0.5862$ , and  $\pm 2.0909$ . To test the consistency of the ZFS parameters in Tables S1-2 with the  $S = 3/2$  EPR, we have evaluated  $\mathcal{D}_{\xi\xi}^{3/2} = -(4/15)\mathcal{D}_{\xi\xi}^A - \mathcal{D}_{\xi\xi}^B$  using  $\mathcal{D}_{\xi\xi}^A$  and  $\mathcal{D}_{\xi\xi}^B$  values for each of the six cases of Table S1. Subsequently, we have calculated the values for  $Q = E/D = (\mathcal{D}_{xx}^{3/2} - \mathcal{D}_{yy}^{3/2})/(3\mathcal{D}_{zz}^{3/2})$  and listed them in 2<sup>nd</sup> column of Table S3 (again,  $\{x, y, z\}$  is the frame of the  $\mathcal{A}^A$  and  $\mathcal{D}^e$  tensors); the 3<sup>rd</sup> column gives the corresponding rhombicity ratio in standard convention ( $Q_{sc}$ ). The 4<sup>th</sup> column lists among the six allowed  $E_{3/2}/D_{3/2}$  values the one that is closest ( $Q_{cl}$ ) to the  $Q$  value in the 2<sup>nd</sup> column. The values for  $Q_{cl} = Q = (\mathcal{D}_{xx}^{3/2} - \mathcal{D}_{yy}^{3/2})/(3\mathcal{D}_{zz}^{3/2})$  and  $\mathcal{D}_{\xi\xi}^e$  ( $\xi = x, y$ ) impose three linear conditions on  $D_A$ ,  $E_A$ ,  $D_B$ , and  $E_B$ . Using these, the quantities  $D_A$ ,  $E_A$ , and  $E_B$  can be expressed in terms of  $D_B$ ,  $E_{3/2}/D_{3/2}$ ,  $\mathcal{D}_{xx}^e$ , and  $\mathcal{D}_{yy}^e$ :

$$D_A = \frac{1}{8}(D_e - 3D_B) \quad (S2a)$$

$$E_A = \frac{1}{72}(10E_e - Q(D_e + 27D_B)) \quad (S2b)$$

$$E_B = \frac{1}{27}(-E_e + Q(D_e + 27D_B)), \quad (S2c)$$

where we have introduced the quantities  $D_e$ , and  $E_e$ , which are defined as  $D_e = -\frac{3}{2}(\mathcal{D}_{xx}^e + \mathcal{D}_{yy}^e)$  and  $E_e = \frac{1}{2}(\mathcal{D}_{xx}^e - \mathcal{D}_{yy}^e)$ . Since  $S = 3/2$  EPR gives no information about the labeling of the axes for which  $E_{3/2}/D_{3/2} = 0.15$ , the value of  $Q$  to be adopted in eqs 2a-c can be any of the allowed values listed below eq S1. Obviously, the highest degree of consistency is attained by taking in eqs 2Sa-c for  $Q$  the allowed  $Q$  value closest to the value in the 2<sup>nd</sup> column, i.e.  $Q_{cl}$  (4<sup>th</sup> column). For example, substitution of  $D_B = 3.88 \text{ cm}^{-1}$ ,  $Q = -0.15$ ,  $\mathcal{D}_{xx}^e = -7.10 \text{ cm}^{-1}$ , and  $\mathcal{D}_{yy}^e = 5.13 \text{ cm}^{-1}$  into eqs S2a-c gives  $D_A = -1.08 \text{ cm}^{-1}$ ,  $E_A/D_A = 0.58$ , and  $E_B/D_B = -0.10$ , values that have been listed in the 1<sup>st</sup> row of Table S3.

In an analogous manner, we have evaluated the values of  $D_A$ ,  $E_A/D_A$ , and  $E_B/D_B$  for the other five  $D_B$  entries in Table S1 (see Table S3). Table S4 lists the ZFS parameters of Table S3 in standard convention. A comparison of Tables S4 and S2 shows that the best agreement between the two tables is found for case 4. Slightly less perfect agreements are found for the cases 2, 5, and 1 and the least satisfactory agreements for the cases 6 and 3. The cases with satisfactory agreement  $\{4, 2, 5, 1\}$  contain two subsets. The members of the first subset  $\{4, 2, 5\}$  have a large negative value for  $D_B$  (Table S4) and a positive  $D_A$  of about half the magnitude of  $D_B$  along the same axis (Table S4). The second subset  $\{1\}$  has a positive value for  $D_B$  and a positive value for  $D_A$  along an axis perpendicular to the axis for  $D_B$ . The magnitudes of  $D_B$  and  $D_A$  are about half those for these parameters in the first subset. The  $D_A$  value for the second subset,  $\{1\}$ , is more in line with the value expected for a high-spin ferric site with N/O coordination than the  $D_A$  values for the second subset. However, we think that the first subset,  $\{4, 2, 5\}$ , cannot be ruled out on this account. Thus, we have performed simulations of the Mössbauer spectra

for the two subsets. These simulations revealed a clear preference for the second subset, case 1.

Using the ZFS parameters as adjustable variables and the values for case 1 of Table S1 as initial guess, we have performed a numerical fit of the spectra with eq 1. The fit yielded the values  $D_B = 2.5 \text{ cm}^{-1}$ ,  $E_B/D_B = -0.11$ ,  $D_A = -0.27 \text{ cm}^{-1}$ , and  $E_A/D_A = 2.25$ , implying that  $\mathcal{D}_{\xi\xi}^B(\text{fit}) = (-1.11, -0.56, 1.67) \text{ cm}^{-1}$  and  $\mathcal{D}_{\xi\xi}^A(\text{fit}) = (-0.52, 0.70, -0.18) \text{ cm}^{-1}$  from which follows that  $\mathcal{D}_{\xi\xi}^e(\text{fit}) = (-7.47, 3.90, 3.57) \text{ cm}^{-1}$  using eq 12.  $\mathcal{D}_{\xi\xi}^e(\text{fit})$  differs moderately from  $\mathcal{D}_{\xi\xi}^e = (-7.10, 5.13, 1.97) \text{ cm}^{-1}$  deduced from  $\mathcal{A}^A$ , using eq 5 and  $J = 22.5 \text{ cm}^{-1}$ .  $\mathcal{D}_{zz}^B(\text{fit})$  is smaller than the value for  $\mathcal{D}_{zz}^B(S = 2) = 2.58 \text{ cm}^{-1}$  [ $D_B(S_B = 2) = 3.88 \text{ cm}^{-1}$ ] obtained for case 1. Differences in  $E_B/D_B$  as obtained, on the one hand, from eq 11 and, on the other hand, from eqs S2a-c or the Mössbauer fit may arise when the spin-orbit coupling of the  $S_B = 2$  ground state with  $S_B = 1$  excited states gives non-vanishing contributions to the ZFS (see below). In section S3 it is shown that the  $S_B = 1$  contribution to  $\mathcal{D}^B$  is approximately axial and negative along  $z$ . Adding  $\mathcal{D}_{\xi\xi}^B(S_B = 1) = (0.46, 0.46, -0.92) \text{ cm}^{-1}$  [ $D_B(S_B = 1) = -1.38 \text{ cm}^{-1}$ ] to  $\mathcal{D}_{\xi\xi}^B(S_B = 2) = (-1.90, -0.68, 2.58) \text{ cm}^{-1}$  yields  $\mathcal{D}_{\xi\xi}^B(\text{total}) = (-1.44, -0.22, 1.67) \text{ cm}^{-1}$ , reproducing  $D_B(\text{fit}) = 2.5 \text{ cm}^{-1}$  and providing a negative, albeit more rhombic, value  $E_B/D_B = -0.24$ .

In section 3.4.1 we noticed that the approximate relationship between  $g_{\xi\xi}^B$  and  $g_{\xi\xi}$  given in eq 8 is rather imprecise in the present case. An accurate assessment of this relationship required a more rigorous analysis on the basis of the fundamental Hamiltonian in eq 1. Thus, using eq 1,  $g_{\xi\xi}^B$  had to be taken as (2.14, 2.08, 2.00) to reproduce the values  $g_{\xi\xi} = (1.75, 1.88, 1.96)$  observed for the  $S = 1/2$  ground state (compared with  $g_{\xi\xi}^B = (2.145, 2.114, 2.033)$  from eq 8). By substituting the  $g_{\xi\xi}^B$  values obtained from eq 1 into eq 11, we got the improved estimate  $\mathcal{D}_{\xi\xi}^B(S_B = 2) = (-2.67, -0.26, 2.93) \text{ cm}^{-1}$  [ $D_B = 4.40 \text{ cm}^{-1}$  and  $E_B/D_B = -0.27$ ]. The gap between  $\mathcal{D}_{\xi\xi}^B(S_B = 2) = 2.93 \text{ cm}^{-1}$  and  $\mathcal{D}_{zz}^B(\text{fit}) = 1.67 \text{ cm}^{-1}$  [ $D_B = 2.5 \text{ cm}^{-1}$ ] can be bridged by assuming a matching  $S_B = 1$  contribution,  $\mathcal{D}_{\xi\xi}^B(S_B = 1) = (0.63, 0.63, -1.26) \text{ cm}^{-1}$  [ $D_B(S_B = 1) = -1.90 \text{ cm}^{-1}$ ], yielding  $\mathcal{D}_{\xi\xi}^B(\text{total}) = \mathcal{D}_{\xi\xi}^B(S_B = 2) + \mathcal{D}_{\xi\xi}^B(S_B = 1) = (-2.03, 0.37, 1.67) \text{ cm}^{-1}$  [ $E_B/D_B(\text{total}) = -0.48$ ]. The value  $D_B(S_B = 1) = -1.90 \text{ cm}^{-1}$  has the predicted sign but is a wavenumber smaller in magnitude than the value  $D_B(S_B = 1) = -2.9 \text{ cm}^{-1}$  obtained from the theoretical analysis given in section S3. The value  $E_B/D_B(\text{total}) = -0.48$  is larger than obtained from the simulation.

## S2. Estimates of crystal-field splittings from $g^B$ values

The electronic configuration of  $\text{Fe}_B$ , gleaned from the DFT solution for complex **1**, is approximately  $(d_{xy})^2(d_{xz})^1(d_{yz})^1(d_{z^2})^1(d_{x^2-y^2})^1$ . The non-vanishing values  $\Delta g_x^B = g_x^B - 2 = 0.14$  and  $\Delta g_y^B = g_y^B - 2 = 0.08$  are given by the expressions

$$\Delta g_x^B = -\frac{2\lambda}{\Delta_{xy \rightarrow xz}} \quad (\text{S3a})$$

$$\Delta g_y^B = -\frac{2\lambda}{\Delta_{xy \rightarrow yz}}, \quad (\text{S3b})$$

where  $\lambda = -\zeta/4$  is the effective spin-orbit coupling constant for high-spin ferrous site  $\text{Fe}_B$  and  $\Delta_{d \rightarrow d'}$  the excitation energy for the  $S = 2$  retaining  $d \rightarrow d'$  transitions, and imply  $\Delta_{xy \rightarrow xz} = 1143 \text{ cm}^{-1}$  and  $\Delta_{xy \rightarrow yz} = 2000 \text{ cm}^{-1}$ , assuming  $\lambda = -80 \text{ cm}^{-1}$ . The TD-DFT calculations for **1** place excited state orbitals of  $\text{Fe}_B$  about  $1000 \text{ cm}^{-1}$  higher in energy at  $2184 \text{ cm}^{-1}$  ( $\sim d_{xz}$ ) and  $3031 \text{ cm}^{-1}$  ( $\sim d_{yz}$ ), which is an acceptable discrepancy given the accuracy of these calculations.

## S3. $S_B = 1$ contributions to ZFS of $S_B = 2$ ground state of site $\text{Fe}_B$

Assuming that the  $d_{xz}$  and  $d_{yz}$  orbitals are degenerate, the  $S_B = 1$  contribution to the ZFS of the  $S_B = 2$  ground state is axial along  $z$  and given by

$$D_B^{S_B=1} = -\zeta^2 \left[ \frac{\gamma_{x^2-y^2} \gamma_{xz,yz}}{12\Delta_{x^2-y^2 \rightarrow \{xz,yz\}}} + \frac{\gamma_{z^2} \gamma_{xz,yz}}{4\Delta_{z^2 \rightarrow \{xz,yz\}}} + \frac{\gamma_{xz,yz} \gamma_{x^2-y^2}}{12\Delta_{\{xz,yz\} \rightarrow x^2-y^2}} + \frac{\gamma_{xz,yz} \gamma_{3z^2-r^2}}{4\Delta_{\{xz,yz\} \rightarrow 3z^2-r^2}} - \frac{\gamma_{xz} \gamma_{yz}}{6\Delta_{xz \leftrightarrow yz}} \right] \quad (\text{S4})$$

The theoretical expressions for the excitation energies in terms of Racah parameters  $B$  and  $C$  and crystal-field splitting  $10D_q$  are given in Table S5. The values of the excitation energies listed in the table were obtained using estimates for  $B$ ,  $C$ , and  $10D_q$  from DFT calculations for a system in which  $\text{Fe}_A$  has been replaced by a diamagnetic  $\text{Ga}^{\text{III}}$  ion. More specifically,  $10D_q$  was estimated to be about  $12000 \text{ cm}^{-1}$  from TD-DFT calculations for the  $S_B = 2$  state. By combining the  $10D_q$  value, the free-atom ratio  $C/B \approx 4.5$ , and the difference of the SCF energies for the lowest-lying  $S_B = 1$  excited state and the  $S_B = 2$  ground state (both calculated at the optimized structure for  $S_B = 2$ ) of  $9000 \text{ cm}^{-1}$  (see first line of Table S5), we obtained  $B \approx 700 \text{ cm}^{-1}$ . Since the crystal-field splitting between the  $\{d_{xz}, d_{yz}\}$  orbital energies is small compared to the overall  $S_B = 2$  to  $S_B = 1$  splitting,  $D_B^{S_B=1}$  is approximately axial.

**Table S5.** Contributions to the ZFS of  $S_B = 2$  ground state of  $Fe_B$  arising from spin-orbit coupling with  $S_B = 1$  excited states

| Transition                                       | $\Delta_{d \rightarrow d'}$ <sup>a</sup> | $\Delta_{d \rightarrow d'}$ (cm <sup>-1</sup> ) | $\gamma_d \gamma_{d'}$ <sup>b</sup> | $\Delta D_B^{S_B=1}$ c,d |
|--------------------------------------------------|------------------------------------------|-------------------------------------------------|-------------------------------------|--------------------------|
| $x^2 - y^2 \rightarrow \{xz, yz\}$ <sup>e</sup>  | $7B + 5C - 10D_q$                        | 9000                                            | 0.82                                | -0.78                    |
| $z^2 \rightarrow \{xz, yz\}$ <sup>e</sup>        | $11B + 5C - 10D_q$                       | 12000                                           | 0.87                                | -1.86                    |
| $\{xz, yz\} \rightarrow x^2 - y^2$ <sup>e</sup>  | $22B + 5C + 10D_q$                       | 43000                                           | 0.82                                | -0.16                    |
| $\{xz, yz\} \rightarrow 3z^2 - r^2$ <sup>e</sup> | $6B + 5C + 10D_q$                        | 32000                                           | 0.87                                | -0.70                    |
| $xz \leftrightarrow yz$ <sup>e</sup>             | $13B + 5C$                               | 25000                                           | 0.93                                | +0.63                    |

<sup>a</sup>  $B = 700$  cm<sup>-1</sup>,  $C = 3200$  cm<sup>-1</sup>,  $10D_q = 12000$  cm<sup>-1</sup>.

<sup>b</sup> Covalency factors estimated from Mulliken populations:  $\gamma_{xz} = 0.96$ ,  $\gamma_{yz} = 0.96$ ,  $\gamma_{x^2-y^2} = 0.85$ ,  $\gamma_{3z^2-r^2} = 0.90$ .

<sup>c</sup> Using  $\zeta = 320$  cm<sup>-1</sup>.

<sup>d</sup> Sum gives the total  $D_B^{S_B=1} = -2.9$  cm<sup>-1</sup>.

<sup>e</sup> Combined contribution of two degenerate transitions.

**Table S6.** Coordinates of b3lyp/6-311g optimized structure for ferromagnetic state of **1**

|    |             |             |             |
|----|-------------|-------------|-------------|
| Fe | -2.14549505 | 0.16136435  | 0.00054995  |
| Fe | 1.45615947  | -0.66824859 | -0.22467545 |
| O  | -0.46280831 | -0.12511038 | -1.01327261 |
| O  | -1.38746585 | -0.27244580 | 1.68837572  |
| O  | 0.80141593  | -0.81726399 | 1.68880510  |
| N  | -2.92992817 | 0.56014102  | -2.20813760 |
| N  | -3.20402832 | -1.57322937 | -0.51818950 |
| N  | -4.73094319 | -2.67474532 | -1.73676641 |
| N  | -2.11810536 | 2.23929840  | -0.17392330 |
| N  | -2.64036240 | 4.17655512  | -1.17131096 |
| N  | 1.99218921  | -0.26580873 | -2.48348287 |
| N  | 3.40978635  | -1.47321724 | -0.41854167 |
| N  | 5.14026872  | -2.09939651 | -1.70368801 |
| N  | 2.26468008  | 1.28758184  | -0.13937436 |
| N  | 3.42516925  | 2.96010856  | -1.08826615 |
| N  | -4.12572537 | 0.63667064  | 1.06728227  |
| N  | 0.81569855  | -2.83779477 | -0.46574990 |
| C  | -0.43768999 | 0.32577329  | -2.38739242 |
| H  | -0.25491962 | 1.40729421  | -2.39815436 |
| C  | -1.79559921 | 0.01722725  | -3.02930826 |
| H  | -1.85371052 | 0.40026897  | -4.05367819 |
| H  | -1.91116972 | -1.06479081 | -3.06263714 |
| C  | 0.67336792  | -0.40015855 | -3.16291462 |
| H  | 0.43020104  | -1.46112772 | -3.18742948 |
| H  | 0.71533042  | -0.03406355 | -4.19662151 |
| C  | -4.16577801 | -0.26772338 | -2.38938071 |
| H  | -4.34668842 | -0.48390667 | -3.44646991 |
| H  | -5.01789276 | 0.30701576  | -2.02206483 |
| C  | -4.02525162 | -1.51890678 | -1.57827581 |
| C  | -3.38705539 | -2.84047308 | 0.06884072  |
| C  | -4.34312193 | -3.54297470 | -0.69753518 |
| C  | -4.76012488 | -4.83406477 | -0.36292688 |
| H  | -5.49297648 | -5.37373458 | -0.94457749 |
| C  | -4.19376943 | -5.40120756 | 0.77601853  |
| H  | -4.49690771 | -6.39309856 | 1.07817000  |
| C  | -3.24539879 | -4.70154561 | 1.55482275  |
| H  | -2.85294507 | -5.16928479 | 2.44664297  |
| C  | -2.82792039 | -3.41685986 | 1.21449141  |
| H  | -2.12402203 | -2.87272411 | 1.82436542  |
| C  | -5.71778007 | -2.99791636 | -2.79656393 |
| H  | -6.15884666 | -2.06290360 | -3.13967377 |
| H  | -6.51889611 | -3.56193201 | -2.32104472 |
| C  | -5.10947845 | -3.78348692 | -3.96079932 |
| H  | -5.88468416 | -4.01524493 | -4.69123620 |



|   |             |             |             |
|---|-------------|-------------|-------------|
| H | -4.67669873 | -4.72485842 | -3.62387141 |
| H | -4.33158026 | -3.21078135 | -4.46824921 |
| C | -3.16051541 | 2.02410988  | -2.42802836 |
| H | -4.23181751 | 2.20830770  | -2.53245092 |
| H | -2.70359154 | 2.34080156  | -3.36963691 |
| C | -2.62307222 | 2.81607982  | -1.27385465 |
| C | -1.78407882 | 3.28248531  | 0.71418145  |
| C | -2.10517333 | 4.50681491  | 0.09018580  |
| C | -1.90690756 | 5.73639076  | 0.72266063  |
| H | -2.15313754 | 6.67622802  | 0.25062381  |
| C | -1.37662970 | 5.69995124  | 2.01025226  |
| H | -1.21020511 | 6.62733728  | 2.53864035  |
| C | -1.05732521 | 4.47937874  | 2.64275946  |
| H | -0.65121447 | 4.49852790  | 3.64347697  |
| C | -1.25624608 | 3.25641188  | 2.00829755  |
| H | -1.01849705 | 2.32363667  | 2.49546651  |
| C | -3.11420042 | 5.15230994  | -2.18053825 |
| H | -3.85610980 | 4.65555654  | -2.80512325 |
| H | -3.63937886 | 5.93884673  | -1.64033690 |
| C | -1.98243259 | 5.73596128  | -3.03056210 |
| H | -2.38858733 | 6.46396100  | -3.73295000 |
| H | -1.47424388 | 4.96153025  | -3.60761191 |
| H | -1.24302340 | 6.24423952  | -2.41245190 |
| C | 2.96363405  | -1.34775237 | -2.84573763 |
| H | 3.53706667  | -1.08833913 | -3.74037855 |
| H | 2.38870915  | -2.24376717 | -3.08489494 |
| C | 3.85498461  | -1.62692135 | -1.67223109 |
| C | 4.45652001  | -1.86471372 | 0.43243955  |
| C | 5.54900079  | -2.26765435 | -0.36616335 |
| C | 6.75182433  | -2.70791373 | 0.19388430  |
| H | 7.59201878  | -3.01924128 | -0.40928456 |
| C | 6.82527725  | -2.72940709 | 1.58404682  |
| H | 7.73674045  | -3.06214852 | 2.05884886  |
| C | 5.73771995  | -2.32425302 | 2.38956253  |
| H | 5.84427603  | -2.35407828 | 3.46431430  |
| C | 4.54281438  | -1.88597105 | 1.82845387  |
| H | 3.71143142  | -1.56589073 | 2.43922204  |
| C | 5.96236072  | -2.43621493 | -2.88784391 |
| H | 6.98862808  | -2.16134314 | -2.64877376 |
| H | 5.65043571  | -1.79216385 | -3.70952227 |
| C | 5.87035780  | -3.91251285 | -3.28406039 |
| H | 6.52444845  | -4.10706155 | -4.13425118 |
| H | 4.85472959  | -4.18745429 | -3.57308938 |
| H | 6.18153636  | -4.56268009 | -2.46703793 |
| C | 2.59276823  | 1.10245162  | -2.61182792 |
| H | 1.97817010  | 1.70486279  | -3.28709252 |

|   |             |             |             |
|---|-------------|-------------|-------------|
| H | 3.57122330  | 1.02183776  | -3.09223497 |
| C | 2.74176028  | 1.78717903  | -1.28345160 |
| C | 2.66535508  | 2.17383913  | 0.88027407  |
| C | 3.38731131  | 3.23391797  | 0.29161879  |
| C | 3.93911008  | 4.26990693  | 1.04957098  |
| H | 4.49592092  | 5.08074585  | 0.60282958  |
| C | 3.75221086  | 4.20690024  | 2.42825291  |
| H | 4.17060012  | 4.98217351  | 3.05368197  |
| C | 3.04163096  | 3.14475920  | 3.02789433  |
| H | 2.93666903  | 3.12661032  | 4.10333043  |
| C | 2.49059339  | 2.11753421  | 2.26714201  |
| H | 1.96734121  | 1.29323894  | 2.72634036  |
| C | 4.08054410  | 3.81000351  | -2.10459983 |
| H | 4.36634577  | 3.17572174  | -2.94334950 |
| H | 5.00655415  | 4.17865596  | -1.66519611 |
| C | 3.20151179  | 4.97233671  | -2.57547874 |
| H | 3.74665153  | 5.57840749  | -3.29942982 |
| H | 2.91893701  | 5.61642739  | -1.74318149 |
| H | 2.28962398  | 4.61324154  | -3.05606597 |
| C | -0.29614545 | -0.66904060 | 2.32635581  |
| C | -0.38581829 | -0.92849665 | 3.76852836  |
| C | 0.74017066  | -1.41025670 | 4.46384369  |
| H | 1.65737498  | -1.58944376 | 3.92281911  |
| C | 0.66329692  | -1.65781514 | 5.83176311  |
| H | 1.52765464  | -2.02868464 | 6.36364011  |
| C | -0.53403978 | -1.42719498 | 6.51956102  |
| H | -0.59091537 | -1.61870174 | 7.58177571  |
| C | -1.65766703 | -0.94991903 | 5.83489113  |
| H | -2.57911764 | -0.77374556 | 6.37138795  |
| C | -1.58788080 | -0.70201649 | 4.46602385  |
| H | -2.44848519 | -0.33363085 | 3.92773957  |
| C | -5.00813700 | 0.86539703  | 1.78864852  |
| C | -6.10439395 | 1.15138850  | 2.69824535  |
| H | -6.40629661 | 0.24917858  | 3.23108296  |
| H | -6.96924442 | 1.53225344  | 2.15398684  |
| H | -5.80580416 | 1.90181992  | 3.43101972  |
| C | 0.67485799  | -3.98300925 | -0.32048488 |
| C | 0.51078946  | -5.41233489 | -0.11491184 |
| H | 1.21731456  | -5.77077712 | 0.63466914  |
| H | 0.68704252  | -5.96261128 | -1.03952912 |
| H | -0.49951859 | -5.63286305 | 0.23070467  |

**Table S7.** Coordinates of b3lyp/6-311g optimized structure for broken symmetry state of complex **1**

|    |           |           |           |
|----|-----------|-----------|-----------|
| Fe | 2.137106  | 0.368137  | 0.126718  |
| O  | 0.397637  | 0.368681  | -0.780335 |
| O  | 1.437850  | 0.449692  | 1.884715  |
| O  | -0.815679 | 0.418095  | 2.051178  |
| N  | 2.866754  | 0.380218  | -2.143150 |
| N  | 2.752190  | 2.332096  | -0.239016 |
| N  | 3.918111  | 3.875454  | -1.372124 |
| N  | 2.575059  | -1.625201 | -0.277035 |
| N  | 3.454407  | -3.286876 | -1.495005 |
| N  | -2.128086 | 0.106158  | -2.157299 |
| N  | -3.665621 | 0.709604  | 0.084865  |
| N  | -5.558314 | 1.067171  | -1.069508 |
| N  | -1.897918 | -1.732049 | -0.023424 |
| N  | -2.739738 | -3.495508 | -1.132571 |
| C  | 0.375716  | 0.067113  | -2.198688 |
| C  | 1.592434  | 0.728494  | -2.856628 |
| C  | -0.909186 | 0.613790  | -2.841316 |
| C  | 3.872372  | 1.483242  | -2.275534 |
| C  | 3.501965  | 2.578729  | -1.324729 |
| C  | 2.677224  | 3.539289  | 0.483713  |
| C  | 3.404345  | 4.518460  | -0.228545 |
| C  | 3.537436  | 5.829583  | 0.236255  |
| C  | 2.923451  | 6.130899  | 1.449339  |
| C  | 2.203517  | 5.155208  | 2.173697  |
| C  | 2.068370  | 3.850608  | 1.704344  |
| C  | 4.740553  | 4.527839  | -2.420977 |
| C  | 3.900179  | 5.270565  | -3.462757 |
| C  | 3.404798  | -0.962416 | -2.531097 |
| C  | 3.127568  | -1.964017 | -1.451294 |
| C  | 2.540127  | -2.796790 | 0.508643  |
| C  | 3.086987  | -3.849490 | -0.255770 |
| C  | 3.209117  | -5.146909 | 0.246909  |
| C  | 2.767468  | -5.357353 | 1.551009  |
| C  | 2.224233  | -4.308979 | 2.323770  |
| C  | 2.104086  | -3.017494 | 1.818386  |
| C  | 4.071658  | -4.027528 | -2.620383 |
| C  | 3.048330  | -4.759152 | -3.492892 |
| C  | -3.331400 | 0.976401  | -2.349649 |
| C  | -4.198496 | 0.903364  | -1.127727 |
| C  | -4.728351 | 0.747728  | 1.002420  |
| C  | -5.923981 | 0.979106  | 0.287562  |
| C  | -7.164049 | 1.063996  | 0.927378  |
| C  | -7.167814 | 0.906780  | 2.310716  |

|   |           |           |           |
|---|-----------|-----------|-----------|
| C | -5.976317 | 0.672200  | 3.032700  |
| C | -4.744473 | 0.588092  | 2.392284  |
| C | -6.495172 | 1.343105  | -2.181570 |
| C | -6.761032 | 2.836957  | -2.388029 |
| C | -2.418567 | -1.336866 | -2.437741 |
| C | -2.331507 | -2.187125 | -1.202345 |
| C | -2.035933 | -2.796790 | 0.888481  |
| C | -2.556164 | -3.912788 | 0.198762  |
| C | -2.827072 | -5.123953 | 0.840832  |
| C | -2.567689 | -5.181104 | 2.208074  |
| C | -2.057412 | -4.066991 | 2.908985  |
| C | -1.785117 | -2.864469 | 2.263070  |
| C | -3.270029 | -4.341768 | -2.221782 |
| C | -2.199947 | -5.215889 | -2.882728 |
| C | 0.321213  | 0.483911  | 2.614172  |
| C | 0.460367  | 0.597751  | 4.070689  |
| C | -0.692524 | 0.660810  | 4.877507  |
| C | -0.571800 | 0.769531  | 6.259913  |
| C | 0.696803  | 0.817526  | 6.850717  |
| C | 1.846946  | 0.757778  | 6.055036  |
| C | 1.733120  | 0.648409  | 4.671285  |
| H | 0.421322  | -1.021542 | -2.320218 |
| H | 1.668917  | 0.464989  | -3.916606 |
| H | 1.466414  | 1.807308  | -2.782953 |
| H | -0.905590 | 1.696959  | -2.732422 |
| H | -0.920497 | 0.377679  | -3.913473 |
| H | 3.935335  | 1.840711  | -3.307550 |
| H | 4.852492  | 1.086110  | -2.005951 |
| H | 4.094912  | 6.580619  | -0.303865 |
| H | 3.011179  | 7.129653  | 1.851581  |
| H | 1.766331  | 5.425772  | 3.124373  |
| H | 1.540859  | 3.100224  | 2.271703  |
| H | 5.358951  | 3.761643  | -2.886709 |
| H | 5.421361  | 5.207777  | -1.910995 |
| H | 4.556692  | 5.748246  | -4.190060 |
| H | 3.290483  | 6.047598  | -3.002905 |
| H | 3.239441  | 4.591060  | -4.003341 |
| H | 4.482093  | -0.886623 | -2.693135 |
| H | 2.974372  | -1.280969 | -3.484457 |
| H | 3.627789  | -5.955379 | -0.334321 |
| H | 2.845981  | -6.344755 | 1.981980  |
| H | 1.896858  | -4.516767 | 3.331909  |
| H | 1.695961  | -2.216840 | 2.414888  |
| H | 4.652935  | -3.318932 | -3.209928 |
| H | 4.783615  | -4.727995 | -2.186241 |
| H | 3.563923  | -5.304171 | -4.283721 |

|    |           |           |           |
|----|-----------|-----------|-----------|
| H  | 2.352780  | -4.063168 | -3.964961 |
| H  | 2.472432  | -5.478705 | -2.911766 |
| H  | -3.882193 | 0.704955  | -3.255235 |
| H  | -2.982278 | 2.001275  | -2.485568 |
| H  | -8.082867 | 1.242615  | 0.388330  |
| H  | -8.104649 | 0.964273  | 2.845514  |
| H  | -6.030385 | 0.553643  | 4.105265  |
| H  | -3.831547 | 0.402441  | 2.939019  |
| H  | -7.418950 | 0.811966  | -1.956648 |
| H  | -6.088095 | 0.891390  | -3.085794 |
| H  | -7.484804 | 2.975063  | -3.191570 |
| H  | -5.850329 | 3.371965  | -2.661993 |
| H  | -7.169225 | 3.295154  | -1.487729 |
| H  | -1.730005 | -1.702610 | -3.205355 |
| H  | -3.418189 | -1.424076 | -2.871056 |
| H  | -3.229401 | -5.979272 | 0.317720  |
| H  | -2.772321 | -6.095262 | 2.746360  |
| H  | -1.887893 | -4.151207 | 3.973023  |
| H  | -1.415617 | -2.004339 | 2.799718  |
| H  | -3.746205 | -3.691551 | -2.955392 |
| H  | -4.060738 | -4.956597 | -1.793828 |
| H  | -2.653270 | -5.830518 | -3.660753 |
| H  | -1.731398 | -5.882152 | -2.158818 |
| H  | -1.419456 | -4.608960 | -3.345418 |
| H  | -1.665432 | 0.627802  | 4.409898  |
| H  | -1.456609 | 0.817522  | 6.878198  |
| H  | 0.788096  | 0.901300  | 7.924452  |
| H  | 2.822857  | 0.796283  | 6.517635  |
| H  | 2.612677  | 0.601883  | 4.046603  |
| Fe | -1.563748 | 0.359178  | 0.116034  |
| N  | 4.266314  | 0.254352  | 1.020299  |
| C  | 5.222938  | 0.163993  | 1.674834  |
| C  | 6.412496  | 0.049434  | 2.501284  |
| H  | 6.564406  | 0.958746  | 3.083606  |
| H  | 7.297439  | -0.113729 | 1.885261  |
| H  | 6.318295  | -0.790360 | 3.190608  |
| N  | -1.431588 | 2.619871  | 0.169631  |
| C  | -1.576247 | 3.738629  | 0.452999  |
| C  | -1.768929 | 5.128483  | 0.832312  |
| H  | -2.482670 | 5.201408  | 1.653765  |
| H  | -2.152445 | 5.712392  | -0.004787 |
| H  | -0.825441 | 5.568901  | 1.155800  |

**Table S8.** Selected parameters in b3lyp/6-311g optimized structure for ferromagnetic state (F.S.) and broken symmetry state (B.S.) of **1** (distances in Å and angles in degrees)

|         | F.S.  | B.S.  |
|---------|-------|-------|
| Fe···Fe | 3.703 | 3.701 |
| Fe-O-Fe | 127.4 | 127.9 |
| Fe2-O3  | 2.028 | 2.076 |
| Fe2-O1  | 2.145 | 2.157 |
| Fe2-N6  | 2.356 | 2.356 |
| Fe2-N12 | 2.275 | 2.265 |
| Fe2-N9  | 2.118 | 2.122 |
| Fe2-N7  | 2.121 | 2.131 |
| Fe1-O2  | 1.900 | 1.894 |
| Fe1-O1  | 1.985 | 1.962 |
| Fe1-N1  | 2.376 | 2.384 |
| Fe1-N11 | 2.300 | 2.312 |
| Fe1-N4  | 2.085 | 2.080 |
| Fe1-N2  | 2.097 | 2.090 |

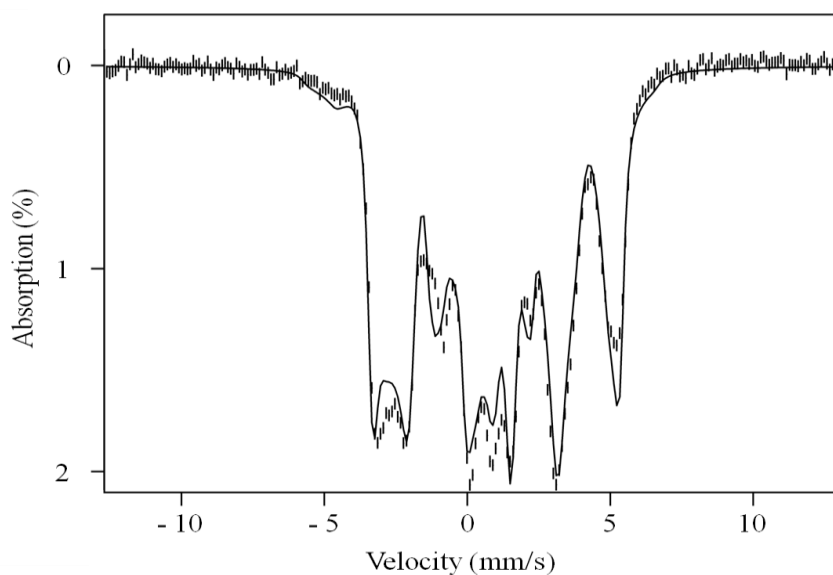

**Figure S1.** Mössbauer spectra of solid **1** recorded at 4.2 K in a parallel field of 7.63 T. The solid lines through the data are spectral simulations based on eq 1, using the parameters listed in Table 4.
